# Supplementary material for: Ducted Wind Turbine Optimization and Sensitivity to Rotor Position
Source: Copernicus journal article supplement (doi:10.5194/wes-2017-55), 2017-11-28
Supplement: Supplementary file [file wes-2017-55-AC1-supplement.pdf]

# Authors' Reply to Comments from Reviewers

## Reply to Comments Reviewer 1

Thank you for going through the paper and providing helpful feedback. Our responses to your comments are given below. Your comments are italicized and our responses are in plain text.

### General Comments

*The manuscript deals with the optimisation of the geometry of a ducted rotor, where the rotor is represented by an actuator disk and the duct by a simple single element aerofoil. An Eppler E423 aerofoil is used for the duct profile.*

*Parameters in the optimisation process are (see attached figure 1): - the location  $z$  of the actuator disk - the air gap  $\Delta r$  between actuator disk and aerofoil - the angle of attack  $\alpha$  of the duct aerofoil.*

*Using a numerical Fluent implementation of the geometry the parameters to be optimised are the Power coefficient  $C_P$  based upon the rotor area and the power coefficient based upon the exit area  $C_{P,total}$ . The rotor diameter and duct chord length are kept fixed in the optimisation.*

*The manuscript presents optimal values for both  $C_P$  and  $C_{P,total}$  together with the corresponding values of  $C_T$ ,  $\alpha$ , air gap and location of actuator disk. A power coefficient  $C_P$  slightly above 1 is found when optimising rotor performance, where this value reduces to around 0.85 when performance is optimised based upon exit area.*

*In order to arrive at optimal conditions, a non-linear quadratic optimisation method is used in two different implementations, but in both cases the authors experience difficulties. Difficulties in determination which combination of parameters are indeed*

*optimal. These are attributed to the observation that flow separation along the duct is a highly non-linear phenomenon, and that optimal operation of a ducted wind turbine is usually close to condition where flow separation occurs.*

*These experienced difficulties in the optimisation procedure are well described, but it is then difficult to draw conclusions about the optimal values. The big issue is not so much the maximum attainable  $C_P$  but the value of the other parameters for which the optimum achieved. It seems that both  $\alpha$  and  $C_T$  are still "moving around quite a lot" while  $C_P$  is converging. The authors try to circumvent this problem by defining their values as being "near-optimal". But how can one declare the tabulated values to be "near-optimal" where there still might be a spread of 0.05 in  $C_T$  and a spread of  $\pm 2$  degrees in  $\alpha$  yielding virtually the same  $C_P$  values?? This is something the authors have to elaborate on further.*

*To the opinion of the reviewer this can be done either by demonstrating that, through one parameter variations around the identified optimal values, all gradients are negative, or by adding an uncertainty band around the secondary parameters (the "other" parameters for the identified maxima in  $C_P$  and  $C_{P,total}$  respectively).*

The following paragraph addressing this question is now added to the end of section 2:

Although, the Hooke and Jeeves method was more efficient, unless stated otherwise, most of the results obtained below were found using Powell's method as this was the first method implemented. As this method did not always satisfy the optimization stopping criterion, we call the optimized designs "near-optimum" points. The search history shown in Fig. ??b is fairly typical for the cases shown below. For each search direction, function evaluations at design points in the search directions of roughly  $\pm 1\%$  were evaluated with no increases in the optimal value. This however does not preclude the possibility of a slow variation along a ridge in the optimization function, which is essentially the reason we see 5% differences in the optimized design variables between the two different optimization methods for this example. In many of the figures below, individual design variables are varied around the optimal point to give a further sense of the sensitivity to the design variables.

*Finally the reviewer would like to see the authors include two more points in the concluding section: - At first about the identified optimal values. Since the search*

*algorithms did not nicely converge it must be stated that the values provided are approximate.*

This is mentioned in the conclusions now:

Although optimal design data obtained from Powell's method should represent characteristics of a good design based on  $C_P$  or  $C_{P,total}$ , due to convergence issues they should be considered approximate. Also at higher Reynolds numbers (i.e. with larger DWTs) the flow field and separation characteristics of the DWT may change which in turn can change the characteristics of the optimal design. Additionally, including effect like swirl and center body in the CFD model should give more realistic results and can change the optimal design.

*Second the remark that the presented optima are identified for a configuration with fairly small  $Re$  numbers (i.e rotor/duct size), and that optimum values might change with increased values of  $Re$ .*

A note on the effect of Reynolds numbers is added to the conclusions as shown in the paragraph above.

## Specific Comments

*Page 2, Line 25. explain this acronym/elaborate a little bit on the type of algorithm used.*

NLPQL stands for Nonlinear Programming by Quadratic Lagrangian. This is now added to the paper with a reference to the paper introducing the method.

*Page 4, Line 3. I don't quite understand previous sentence. What do you mean? You tune the domain discretization to the required/anticipated complexity of the flow? Then say so!!*

The sentence is now further explained. The sentence refers to the shape of domain where inlet and outlet boundary conditions were not smoothly connected at top of domain. A smooth transition between inflow and outflow caused convergence issues in Ansys Fluent.

*Page 4, Line 15. I am afraid this pictures are not clear to the reader. What do we see top left?? Why do you brand the left border as inlet and the right as outlet.*

*Better emphasize the direction of the flow (from left to right) and use enlargement boxes to go from top left to top right to bottom centre.*

An improved figure is included in the revised manuscript and the figure caption now explains the Figure better.

*Page 7, Line 2. Do you have clear indications for this or is it pure speculation. In other words what turbulence model is used by Venter and is there proof that their turbulence model is indeed inferior?*

This is now further explained in the manuscript. Venters et al had used the  $k - \epsilon$  realizable turbulence model. In flows where there are significant adverse pressure gradient and flow separation the  $k - \omega$  SST model is more accurate at prediction of flow field and flow separation than  $k - \epsilon$  turbulence models [1].

*Page 7, Line 21. What do you mean here? Larger  $\Delta r/D$  goes together with smaller  $\alpha$  and hence a smaller exit diameter, or this goes together with a smaller ratio  $R/D$  (since  $R$  gets larger)? Explain!!*

This is further explained in the revised manuscript. In Fig. 9, like Figures 5, 6, 10 and 12, only one design variable was varied while other design variables were kept constant. Therefore, keeping all other design variables constant, reducing the rotor gap resulted in a smaller duct with a smaller exit diameter. Previous studies as reviewed in the introduction conclude that the swallowing effect of diffuser is directly related to the exit area of the duct. Therefore, we noted in paper that the reduction in  $C_P$  due to reduction of the rotor gap was accompanied by a reduction of the duct exit area.

*Page 8, Line 5. You might want to add a sentence that states that, given this result, a location near or at the throat of the diffuser is to be favoured, because then the system works optimal using the smallest size of the rotor.*

This is true if  $C_P$  be the design objective function and the incremental increase in cost of a wind turbine for going to slightly larger turbines be uneconomical considering the additional power one can obtain by using a larger rotor further downstream where the  $C_P$  is almost the same. However we believe that  $C_{P,total}$  is also a useful metric for the whole ducted wind turbine which in the absence of detailed economic analysis can be helpful. In this case, the  $C_P$  is almost the same when the rotor is placed at  $0.1 < z/c < 0.5$ . However, the largest  $C_{P,total}$  can be obtained at  $z/c = 0.5$ . Therefore, in absence of detailed economic analysis, we would say it is better to place the rotor further downstream at  $z/c = 0.5$ .

*Page 8, Line 5. Shouldn't you refer back here to the graphs 3b and 4b which both indicate that a near optimum value for CP come with a pretty large uncertainty in both the optimal??  $\alpha$  as well as optimum  $C_T$*

This was addressed in answer to the first comment in the section of General comments and further explanation was added to the paper.

## **Technical Comments**

Thank you for technical comments for improving the manuscript. They are corrected in the revised manuscript.

## Reply to Comments from Reviewer 2

Thank you for going through the paper and providing helpful feedback. Our responses to your comments are given below. Your comments are italicized and our responses are in plain text.

### General Comments

*The article “Ducted Wind Turbine Optimization and Sensitivity to Rotor Position” is clearly written and well structured.*

*It is easily read and understood, partly due to a very clear language and presentation mode, and partly because the paper presents new numerical DAWT results but without any new contributions to DAWT theory.*

*Another virtue of the article is the validation of the CFD actuator disk model by successful comparison against the HAWT open rotor ideal  $C_p$  (Betz limit). Subsequent application of the validated CFD actuator disk model on DAWTs, leading to optimized power performance above Betz for  $C_{P,total}$ . Such a “Betz-exceeding” result is not new, but it is still a result which until a few years ago might have been regarded as controversial, since it was speculated by some researchers whether Betz limit provided an upper limit for  $C_{P,total}$  for DAWTs. This has later been demonstrated not to be the case, and the present paper adds further evidence to this.*

*An interesting result of the paper is the aft position of the actuator disk for configurations that have been optimized for  $C_{P,total}$ . It seems to have a stall-suppressing impact for single-element diffuser profiles that are otherwise prone to suction side stall.*

We thank you for positive evaluation of the article.

### Specific Comments

*Page 2, Line 15. Werle and Pretz arrived at similar optimum  $C_T$  value by introducing a shroud coefficient,  $C_s$ , in the 1D DAWT momentum analysis. Reference to this article should be considered. Hjort and Larsen did a  $C_P$  and  $C_{P,total}$  optimization on multi-element DAWTs using a very similar actuator disk model. Reference to their paper (multilayered DAWT design) should be included.*

The references are added to the revised manuscript.

*Page 3. A clarification of available power (ideal, 100% rotor efficiency) and extracted power (with obtainable rotor efficiency of typically 80-90%) should be considered to clarify concepts.*

The following has been added on section 2 at the bottom of page 3:

Clearly, with an actuator disc model rotor blade efficiency losses are not considered.

*Page 7. Identifying coupling between low thrust and inner diffuser separation - good.*

*Page 8. Benchmark comparison (model validation) with bare prop HAWT: Good !!*

*Page 11. Fig 12: Interesting reverse dependency of  $C_{pMax}$  (based on rotor and exit area resp.) on disk location.*

Thank you!

*Page 11. Before concluding, it would suit the article to elaborate on the possible pitfalls when trying to "extrapolate" AD CFD results to obtainable "real life" DAWT power extracted power. After all, DAWTs have a troubled history with many failures of meeting expectations when going "real life". Issues to consider: Swirl, Center body impact (nacelle), etc.*

This is now noted in conclusions:

Although optimal design data obtained from Powell's method should represent characteristics of a good design based on  $C_P$  or  $C_{P,total}$ , due to convergence issues they should be considered approximate. Also at higher Reynolds numbers (i.e. with larger DWTs) the flow field and separation characteristics of the DWT may change which in turn can change the characteristics of the optimal design. Additionally, including effect like swirl and center body in the CFD model should give more realistic results and can change the optimal design.

## References

- [1] F. R. Menter, "Two-equation eddy-viscosity turbulence models for engineering applications," *AIAA Journal*, vol. 32, pp. 1598–1605, 2017/11/20 1994.

# Ducted Wind Turbine Optimization and Sensitivity to Rotor Position

Nojan Bagheri-Sadeghi<sup>1</sup>, Brian T. Helenbrook<sup>1</sup>, and Kenneth D. Visser<sup>1</sup>

<sup>1</sup>Mechanical and Aeronautical Engineering Department, Clarkson University, Potsdam, NY, 13699-5725, USA

*Correspondence to:* Brian T. Helenbrook (helenbrk@clarkson.edu)

**Abstract.** The design of a ducted wind turbine modeled using an actuator disc was studied using RANS CFD simulations. The design variables included the rotor thrust coefficient, the angle of attack of the duct cross-section, the radial gap between the rotor and the duct, and the axial location of the rotor in the duct. Two different power coefficients, the rotor power coefficient (based on the rotor swept area) and the total power coefficient (based on the exit area of the duct) were used as optimization objectives. The optimal value of thrust coefficients for all designs was nearly constant having a value between 0.9 and 1. The rotor power coefficient was sensitive to rotor gap but was insensitive to the rotor's axial location for positions ranging from upstream of the throat to nearly half the distance down the duct. Compared to the design that maximized rotor power coefficient, the design for maximal total power coefficient was characterized by a smaller angle of attack, a smaller rotor gap and a downstream placement of the rotor. The insensitivity of power output to the rotor position implies that a rotor placed further downstream in the duct could produce the same power with a considerably smaller duct exit area and thus a greater total power coefficient. The design for that maximized total power coefficient exceeded Betz's limit with a total power coefficient of 0.67.

*Copyright statement.* TEXT

## 1 Introduction

A properly-designed duct placed around a wind turbine can increase power output by increasing the mass flow rate through the rotor. Ducted wind turbines (DWTs) are also called diffuser augmented wind turbines (DAWT) or shrouded wind turbines. Lilley and Rainbird (1956) performed a one-dimensional momentum analysis of DWTs and concluded [that](#) higher expansion ratios of the duct and more subatmospheric pressures at the exit plane of the duct result in higher power outputs. They also suggested wind tunnel tests with screens of different porosities to model the pressure drop across the rotor. Such experimental tests were performed by Igra (1976, 1977, 1981); Foreman et al. (1978); Gilbert et al. (1978), and Gilbert and Foreman (1979). The negative effect of flow separation on the power output of DWTs was observed and various methods of preventing separation was investigated. Also, experimental tests with real turbines were performed and the power augmentation of DWTs was demonstrated (Igra (1981); Gilbert and Foreman (1979, 1983)). As the duct can be considered an annular wing (De vries (1979)) with higher lift meaning more suction and circulation, high-lift airfoils were used from early experimental studies.



Using lifting line theory for the rotor and modeling the duct as a superposition of vortex and source rings Koras and Georgalas (1988) and Georgalas et al. (1991) studied the power output of DWTs with airfoil cross-sections and large rotor gaps (the clearance between the tip of the rotor and the duct) as a function of several design variables including the angle of attack of the duct cross-section, the chord length of the duct, the maximum camber of the duct cross section, and the relative position of the rotor with respect to the maximum camber point of the duct cross-section. They found a linear increase of power with duct chord length and angle of attack of the duct cross-section. They also concluded that the effect of rotor position on the power output was weak. Politis and Koras (1995) extended the previous work to DWTs with any rotor gap.

Axisymmetric CFD models were used (Phillips et al. (1999, 2002) and Phillips (2003)) to improve the design of the first full-scale DWT built (the Vortec 7). Hansen et al. (2000) performed a CFD study of DWTs and used the  $k-\omega$  SST turbulence model for the axisymmetric model as it is more sensitive to adverse pressure gradients (Menter (1994)) and can be more accurate in predicting flow separation. Another similar CFD study was performed by Abe and Ohya (2004) where effects of rotor loading and the incidence angle of the duct on power output of a flanged DWT was examined and compared with experimental data. Ohya et al. (2012) and Kardous et al. (2013) did further CFD simulations of the flanged DWT with the rotor modeled as an actuator disc and found good agreement with wind tunnel data.

van Bussel (1999, 2007) analyzed DWTs using 1-D momentum theory and concluded that optimal coefficient of thrust in a DWT is similar to an open rotor equal to 8/9. He also concluded that experimental power coefficients based on the exit area of the duct (the total power coefficient) above 0.5 have not been achieved yet and very significant back pressure reductions are needed to achieve values of total power coefficients significantly above Betz's limit. Jamieson (2009) also used a similar momentum analysis and derived the same value of 8/9 for optimal loading on the rotor and noted that it should be independent of duct design. Werle and Presz (2008) in another study based on 1-D momentum analysis found that the maximum attainable power from a DWT is determined by shroud force coefficient,  $C_s = F_s/T$  where  $F_s$  is the axial force on the duct (shroud) and  $T$  is the thrust of the rotor.

Aranake and Duraisamy (2017) Hjort and Larsen (2014) used an axisymmetric CFD model with actuator disc modeling the wind turbine for a multi-element DWT. They characterized the performance of the DWT using power coefficients based on the exit area of the duct with values well above Betz limit. Aranake and Duraisamy (2017) also utilized an axisymmetric RANS solver with ~~and~~ an actuator disc model for the turbine to optimize the airfoils used for the duct cross-section and blades and verified the result with 3D simulations. Venters et al. (2017) investigated the optimal design of a DWT using the same approach (i.e. using a RANS solver and actuator disc model). The design variables investigated were the rotor loading, the angle of attack of the duct cross-section, the rotor gap, and the axial position of the rotor. They used a response surface fitted to a number of design point calculations and then the surface was searched using the NLPQL ~~algorithm~~ (Nonlinear Programming by Quadratic Lagrangian) algorithm Schittkowski (1986). They concluded that rotor loading is the main factor defining the performance of the DWT with the coefficient of thrust almost constant (close to 1) for different duct sizes. The power output of DWT was sensitive to the angle of attack of the duct cross section. However, the results for effect of the rotor gap and axial position of rotor were not conclusive. This paper improves on the work of Venters et al. (2017) with a more accurate CFD model, a direct optimization technique, and a wider range of design variables. One of the goals of this study is to continue the investigation

of Venters et al. (2017) into how the objective of the optimization changes the optimal design. Specifically, Venters et al. (2017) examined two objective [functionfunctions](#), the rotor power coefficient and the total power coefficient. Their results indicated that the optimal design changes significantly depending on the objective function, but the results optimizing the total power coefficient did not converge to an optimal solution. The goal of this work is to identify an optimal configuration for this  
5 objective function.

The paper is organized as follows. The details of the CFD model along with an evaluation of two different pattern search optimization methods are given in section 2. Optimization results with the objective of maximizing rotor power coefficient are given in section 3 and the variation of the rotor power coefficient and flow field with different design variables is presented. In section 4, optimization results are presented for the objective of maximizing the total power coefficient. These results are  
10 compared with the goal of understanding how the optimal axial position of the rotor depends on the optimization objective.

## 2 Method

A two-dimensional axisymmetric [numerical](#) model was developed in Ansys Fluent 17.1 to simulate the flow field of a ducted wind turbine (DWT). The wind turbine rotor was modeled as an actuator disc with a pressure drop,  $\Delta p$ , given by

$$\Delta p = \frac{1}{2} \rho V_z^2 C_{T,rotor} \quad (1)$$

15 where  $\rho$  is the air density and  $C_{T,rotor}$  is the thrust coefficient based on the axial velocity,  $V_z$ , at the rotor. The thrust force,  $T$ , is given by

$$T = 2\pi \int_0^{D/2} \Delta p r dr \quad (2)$$

where  $D$  is the rotor diameter. The extracted power,  $P$  is given by

$$P = 2\pi \int_0^{D/2} V_z \Delta p r dr \quad (3)$$

20 [Clearly, with an actuator disc model rotor blade efficiency losses are not considered.](#) The design variables, shown in Fig. 1, were the thrust coefficient of the rotor  $C_{T,rotor} = \frac{T}{\frac{1}{2} \rho V_z^2 A_{rotor}}$ , the angle of attack of the duct cross-section  $\alpha$ , the radial gap of the rotor  $\Delta r/D$ , and the axial location of the rotor  $z/c$ . Because the thrust coefficient based on the freestream velocity,  $V_\infty$ , is easier to interpret, most results are presented in terms of  $C_T = \frac{T}{\frac{1}{2} \rho V_\infty^2 A_{rotor}}$ . All results are made nondimensional by the rotor diameter, the freestream velocity, and the fluid density. The conditions studied correspond to air with a free-  
25 stream velocity of 11 m/s, a rotor diameter of 2.5 m, and a duct chord length  $c$  such that  $c/D = 27.6\%$ . This corresponds to  $Re_D = 1.88 \times 10^6$  and  $Re_c = 5.20 \times 10^5$  where  $Re_D$  and  $Re_c$  are the Reynolds numbers based on the rotor diameter and [duct](#) chord length respectively. An Eppler E423 airfoil was chosen as the cross-section of the duct. This airfoil is designed to create high lift and operate at low Reynolds numbers. The operating range of Eppler E423 is  $Re_c > 2 \times 10^5$  (Selig et al. (1996)). Two

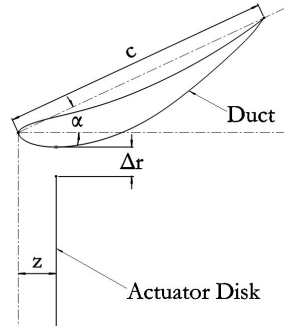

**Figure 1.** The design variables

power coefficients  $C_P = \frac{P}{\frac{1}{2}\rho V_\infty^3 A_{rotor}}$  and  $C_{P,tot} = \frac{P}{\frac{1}{2}\rho V_\infty^3 A_{total}}$   $C_{P,total} = \frac{P}{\frac{1}{2}\rho V_\infty^3 A_{total}}$  were used as objective functions for the optimizations and to compare the performance of different DWT designs.

The domain and mesh used for the simulations are shown in Fig. 2. These were defined to ensure mesh independence for power coefficients as the design variables were varied. The domain extended 15 duct chord lengths upstream of the rotor and 25 chord lengths downstream. Numerical tests showed that this domain size gave power coefficient values that were independent of the domain size to two significant digits. As all optimizations were done with the same domain, this was deemed large enough to accurately calculate changes in the solutions with the design variables. The shape of the domain [at its top](#) made a distinct transition between inflow and outflow boundaries, which eliminated convergence issues due to reverse flow through outlet boundaries. The [reverse flow issue occurred when the inlet and outlet were smoothly connected. The](#) mesh of Fig. 2 consisted of about 500000 elements. The duct boundary layer mesh had a growth rate of 1.1 and the first mesh point was set at  $y^+ \approx 1$ . The boundary layer thickness was calculated as a function of  $Re_c$  for each case and enough inflation layers were used to span the entire boundary layer. The quality-based smoothing option in Fluent was used to improve the mesh quality.

Ansys Fluent's  $k-\omega$  SST turbulence model was used to solve the incompressible Navier-Stokes equations. The pressure-based solver was chosen with the coupled scheme used for the pressure-velocity coupling. Gradients were calculated using the Green-Gauss node-based method and second order discretization schemes were used for pressure, momentum, turbulent kinetic energy and specific dissipation rate. The output power, thrust, and drag coefficient of the duct were calculated and monitored at each iteration to ensure convergence.

## 2.1 Optimization Techniques

For most of the optimization results, a pattern search method (Powell (1964)) was used to find the optimal design of the DWT. Optimizations were first performed with  $C_P$  as the objective function and then with  $C_{P,total}$  as the objective function. The optimization for both objective functions started from the same set of design variables ( $C_{T,rotor} = 0.816$ ,  $\alpha = 25^\circ$ ,  $\Delta r/D = 0.03$  and  $z/c = 0.14$ ). In our implementation of Powell's method a quadratic interpolation of the function values is used to identify the optimal step length to move the design point in the coordinate or pattern directions. The optimization was

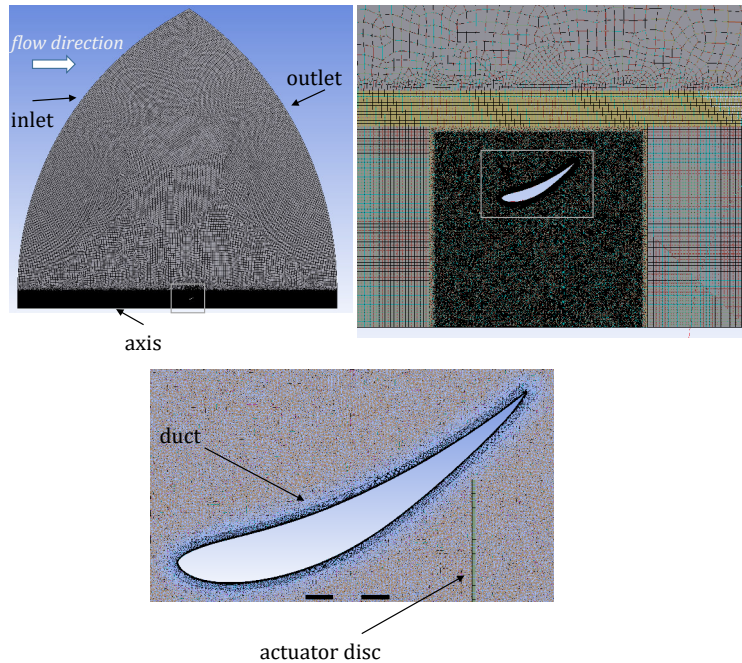

**Figure 2.** The domain and mesh (top left), the zoomed in view of mesh showing the structured mesh upstream and downstream of the duct (top right), and the more zoomed in view of mesh showing the boundary layer mesh, the structured mesh of actuator disc and the unstructured triangular mesh between duct and the actuator disc

stopped when the improvements obtained from the optimization ~~method was methods were~~ within a specified tolerance. The termination criterion was  $\frac{C_{P,optimal} - C_{P,0}}{C_{P,0} + C_{P,optimal}} < 0.005$  where  $C_{P,0}$  is the initial value of  $C_P$  at the beginning of a search cycle. The design variables were then varied to determine the sensitivity of the objective function to the design parameters in the vicinity of the optimal design point.

- 5 Powell's method is known to be slow converging for objective functions that are discontinuous. As shown in the results and discussion section, it was observed that the optimal design points were on the verge of ~~separation~~ flow separation along the duct airfoil and that separation was accompanied with a large drop in power output. Therefore, the objective functions were nearly discontinuous at the optimal design point. With such an objective function, the optimizer worked inefficiently in finding the optimal step length. Also, when the optimizer moved the design point close to a discontinuity, it moved away
- 10 from that point very slowly. Figure 3(a) shows the history of an optimization using Powell's method with  $z/c = 0.05$  fixed and the design variables being  $C_{T,rotor}$ ,  $\alpha$  and  $\Delta r/D$ . The optimization method was stopped at about 100 iterations without meeting its termination tolerance. At that point the search algorithm was jumping around significantly. This is shown in Fig. 3b which shows the search history of  $C_T, \alpha$  points. The optimal point is shown as a red triangle which occurs at  $C_T \approx 1$  and  $\alpha \approx 27^\circ$ . The points close to each other in Powell's method ~~are that are not near the optimum point are~~ design points close to

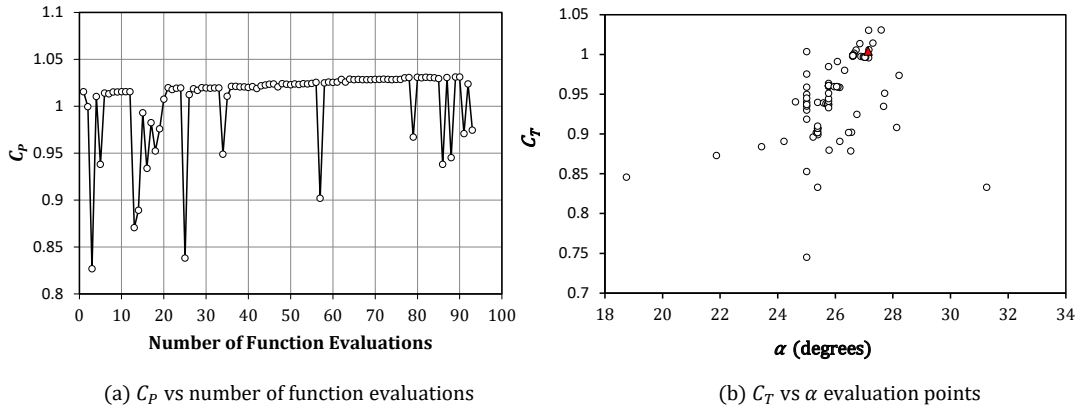

**Figure 3.** Optimization of  $C_P$  using Powell's method for  $z/c$  fixed at 0.05. The red triangle denotes the optimized solution.

separation where the optimizer had trouble finding the optimal step length and was stuck close to the function discontinuity. The maximum  $C_P$  obtained by the search method was 1.031.

The same problem was subsequently approached with the Hooke and Jeeves method (Hooke and Jeeves (1961)) with the same termination criterion and starting point. The optimization history is shown in Fig.4(a). This time the optimization algorithm reached the optimal design in only 16 function evaluations and reached the termination criterion in 32 function evaluations. In addition, a better design with  $C_P = 1.053$  was found. The more efficient performance of Hooke and Jeeves method can also be observed in Fig. 4b which shows the search  $(C_T, \alpha)$  search points. As the optimum point is again shown as a red triangle and occurred at  $C_T = 0.97$  and  $\alpha = 30^\circ$ . Because the Hooke and Jeeves method does not fit an analytic function to the function values, it did not face the same difficulty when it got close to a sharp variation sharp variations in the objective function.

Although, the Hooke and Jeeves method was more efficient, unless stated otherwise, most of the results obtained below were found using Powell's method as this was the first method implemented. As this method did not always satisfy the optimization stopping criterion, we call the optimized designs "near-optimum" points. The search history shown in Fig. 3b is fairly typical for the cases shown below. For each search direction, function evaluations at design points in the search directions of roughly  $\pm 1\%$  were evaluated with no increases in the optimal value. This however does not preclude the possibility of a slow variation along a ridge in the optimization function, which is essentially the reason we see 5% differences in the optimized design variables between the two different optimization methods for this example. In many of the figures below, individual design variables are varied around the optimal point to give a further sense of the sensitivity to the design variables.

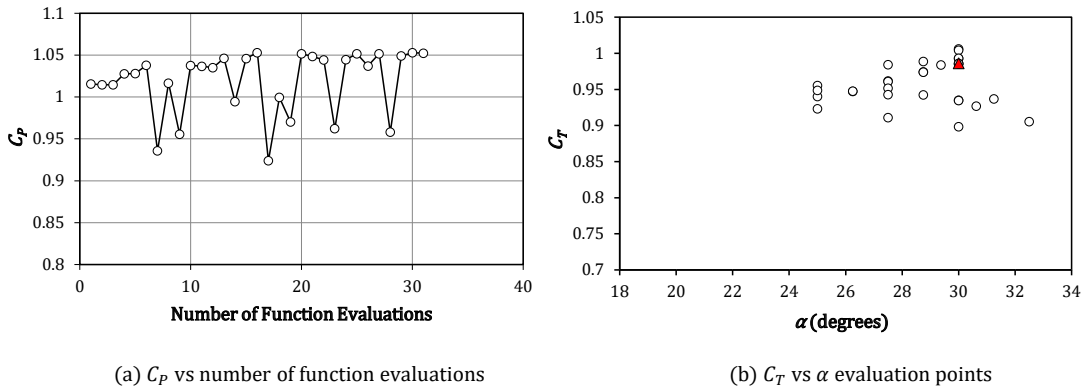

**Figure 4.** Optimization of  $C_P$  using Hooke and Jeeves' method for  $z/c$  fixed at 0.05. The red triangle denotes the optimized solution.

**Table 1.** Comparison of designs based on  $C_P$  and  $C_{P,total}$

|               | Design based on $C_P$ | Design Based on $C_{P,total}$ |
|---------------|-----------------------|-------------------------------|
| $C_T$         | 0.93                  | 0.87                          |
| $\alpha$      | 28                    | 26.2                          |
| $\Delta r/D$  | 0.031                 | 0.019                         |
| $z/c$         | 0.103                 | 0.76                          |
| $C_P$         | 1.04                  | 0.85                          |
| $C_{P,total}$ | 0.57                  | 0.67                          |

### 3 Design for optimal $C_P$

The middle column of Table 1 shows the near-optimal design found with Powell's method when optimizing to maximize for maximum  $C_P$ . The design values are close to what was observed by Venters et al. (2017). Venters et al. (2017) used a smaller chord length for the duct ( $c/D = 22.5\%$ ) and a different turbulence model ( $k-\epsilon$  realizable) and obtained a maximal value for  $C_P = 1.00$  at  $C_T = 1.08$  and  $\alpha = 37.5^\circ$ . Our results predict-predicted a lower value of optimal  $C_T$  and  $\alpha$  which could be because of the more accurate turbulence model as the  $k-\omega$  SST turbulence model is known to be more accurate in prediction of flows with significant adverse pressure gradient and flow separation (Menter (1994)).

The results for the variation of  $C_P$  with  $C_T$  is-are shown in Fig. 5. The highest  $C_P$  in this plot is at  $C_T \approx 0.93$ . When using Hooke and Jeeves optimization, optimal  $C_T$  values very close to 1 were observed which is closer to that observed by Venters. 1-D momentum analysis done by van Bussel (1999) and Jamieson (2009) predicted that the optimal  $C_T$  for a ducted turbine is independent of duct design and has a value of  $8/9$ , which is the same as that of an open rotor. The plot of Fig. 5 also shows the curve for an open rotor as predicted by actuator disc theory. Similar to an open rotor, increasing the loading on the rotor

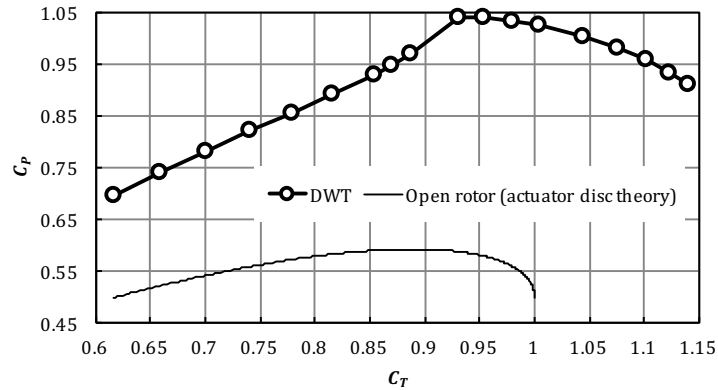

**Figure 5.** Variation of  $C_P$  with  $C_T$  ( $\alpha = 28^\circ$ ,  $\Delta r/D = 0.031$ , and  $z/c = 0.103$ )

beyond the near-optimal design point of the DWT reduced the mass flow rate through the rotor and thus its output power. Also similar to an open rotor, at loadings less than the near-optimal design point, the flow rate through the rotor was larger but the pressure drop was too low to obtain optimal power. In the ducted case however, the reduction in  $C_T$  had an additional effect which was to cause flow separation in the duct. As shown next, there is a strong coupling between the coefficient of thrust, the angle of attack of the duct and separation. Increasing the angle of attack or decreasing the coefficient of thrust can both lead to separation.

The effect of changing  $\alpha$  is shown in Fig. 6. When  $\alpha$  was increased beyond the near-optimal design point, a large flow separation resulted, which was accompanied by a sharp decrease in the output power. The flow-field of the near-optimal design is shown in Fig. 7. The effect of increasing  $\alpha$  on the flow field is shown in Fig. 8. Comparing the two flow fields, it is apparent that the small increase in angle of attack ~~lead~~ leads to a large separated region at the trailing edge of the airfoil. The separated region effectively reduces the exit area area of the duct resulting in the capture of a smaller upstream flow area and a smaller power extraction. Similarly, reducing  $\alpha$  from the near-optimal design also resulted in a decrease of  $C_P$  because of the decreased exit area.

Likewise, as shown in Fig. 9, if rotor gap,  $\Delta r/D$ , was increased beyond the near-optimal design point (while keeping other design variables constant), a large power drop was observed due to flow separation and the streamlines appeared similar to Fig. 8. Decreasing  $\Delta r/D$  ~~reduced the~~ also reduced the power output of the rotor. Reduction of the rotor gap results in a decrease in the exit area of the duct, which resulted in lower power output of the rotor as well could be the reason for the reduction in power.

The dependence of  $C_P$  on the axial position of the rotor,  $z/c$  can be seen from Fig. 10. As  $z/c$  was varied from the near-optimal design, the power output did not change significantly. To better understand the effect of axial location on the power output of the rotor, the design was optimized using Hooke and Jeeves pattern search method at a number of fixed  $z/c$  values from 0.05 to 0.35. The results shown in Fig. 10 confirm that  $C_P$  within the range of  $z/c$  values shown is not very sensitive to

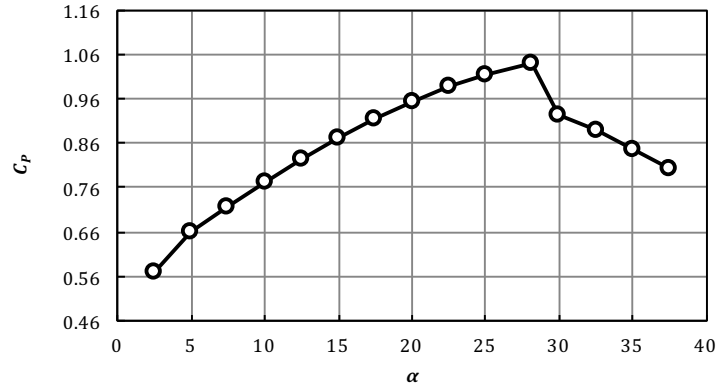

**Figure 6.** Variation of  $C_P$  with  $\alpha$  ( $C_{T,rotor} = 0.763$ ,  $\Delta r/D = 0.031$ , and  $z/c = 0.103$ )

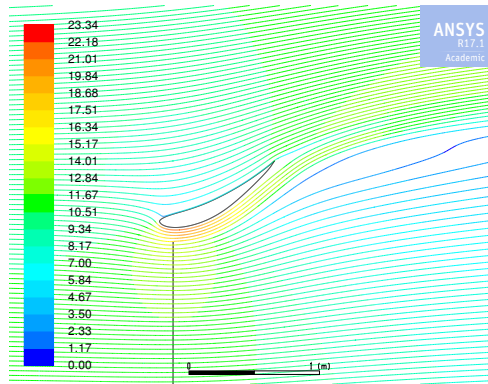

**Figure 7.** Streamlines at  $\alpha = 28.2^\circ$  (The streamlines are colored based on velocity magnitude in  $m/s$ )

the axial position of the rotor. The higher values of  $C_P$  shown are due to better performance of the Hooke and Jeeves search algorithm as discussed in section 2.1. This result shows that one can place the rotor anywhere from upstream of the throat to halfway down the duct and obtain similar performance.

#### 5 4 Design for optimal $C_{P,total}$

The last column of Table 1 shows the near-optimal design parameters when  $C_{P,total}$  was the objective function and Fig. 11 shows the geometry and flow field of the near-optimal design. Compared to the design for optimal  $C_P$ , when a DWT was designed for optimal  $C_{P,total}$  the values of  $\alpha$  and  $\Delta r/D$  were decreased whereas  $z/c$  was increased. All of these changes have a similar effect; to decrease the exit area of the duct, which is in the denominator of the objective function.



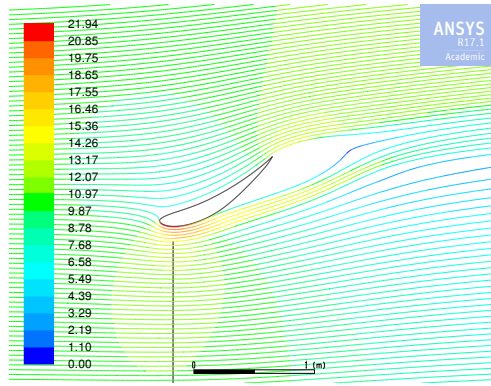

**Figure 8.** Streamlines at  $\alpha = 30^\circ$  (The streamlines are colored based on velocity magnitude in  $m/s$ )

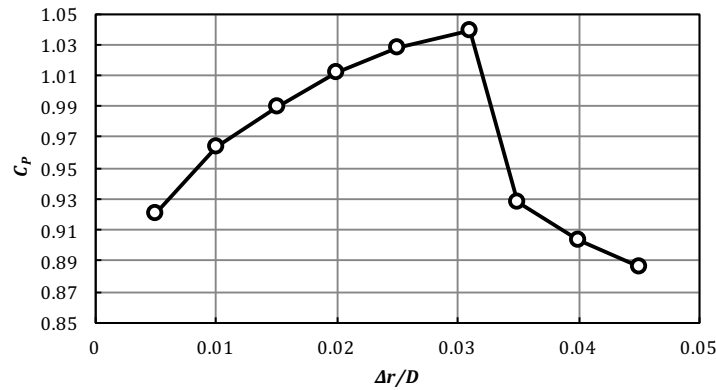

**Figure 9.** Variation of  $C_P$  with  $\Delta r/D$  ( $C_{T,rotor} = 0.763$ ,  $\alpha = 28^\circ$ , and  $z/c = 0.103$ )

The value of  $C_T$  of the near-optimal design (0.87) was close to the optimal  $C_T$  when  $C_P$  was optimized using Powell's method (0.93). It is also close to the optimal value for an open rotor which van Bussel (1999) and Jamieson (2009) predicted. However, there is some ambiguity in the preciseness of this value because both Venters and the Hooke and Jeeves' optimization showed values near 1.00 when optimizing  $C_P$ .

- The variation of  $C_{P,total}$  with  $z/c$  is presented in Fig. 12. All other design variables were fixed at the near-optimal design point for  $C_{P,total}$  as given in Table 1 as  $z/c$  was varied. Since  $C_{P,total}$  depends on both power output and the exit area of the duct, the values of  $C_P$  at each design point are also shown so that variations due to changes in exit area or power can be better understood. Similar to Fig. 10 the power of the rotor,  $C_p$ , is not very sensitive to  $z/c$  when  $z/c < 0.5$ . The exit area decreases as  $z/c$  is increased which makes  $C_{P,total}$  increase as the rotor is moved towards the exit of the duct. When  $z/c$  is increased past 0.5, the power extracted decreases, but  $C_{P,total}$  continues to increase because of the decreasing exit area. Just past the optimal value of  $z/c$  the flow separates leading to a sharp decrease in both  $C_P$  and  $C_{P,total}$ .

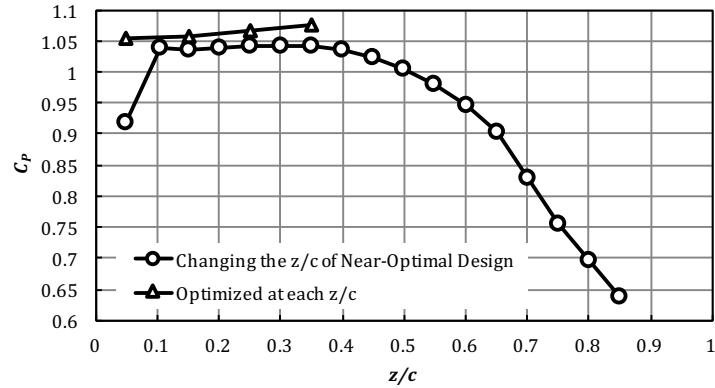

**Figure 10.** Variation of  $C_P$  with  $z/c$

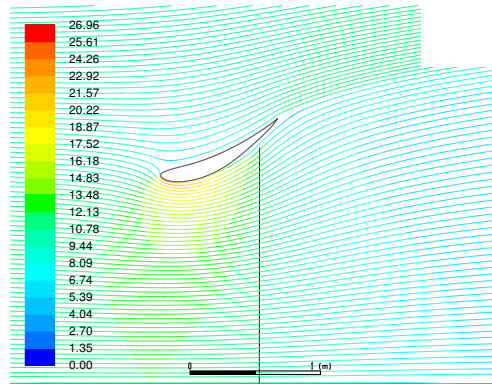

**Figure 11.** Flow field of a near-optimal design based on  $C_{P,total}$

The best value obtained here for  $C_{P,total} = 0.67$  was above Betz's limit and was also higher than the previous result by Venters et al. (2017) of 0.621. Thus, it is possible to extract more power per unit device area using a ducted turbine than when using an open rotor. This is in agreement with theoretical predictions by van Bussel (2007) at high back pressure reductions. To obtain this value of  $C_{P,total}$ , the rotor must be at the rear of the duct.

## 5 Conclusions

The optimal design of a ducted wind turbine characterized by the thrust coefficient of the rotor,  $C_{T,rotor}$ , the angle of attack of the duct cross-section,  $\alpha$ , the rotor gap,  $\Delta r/D$  and the axial location of the rotor  $z/c$  was investigated. The optimal design was significantly different when different power coefficients  $C_P$  (based on rotor area) and  $C_{P,total}$  (based on the exit area of the duct) were used as design objectives. Compared to the design for optimal  $C_P$ , the design for optimal  $C_{P,total}$  resulted in a

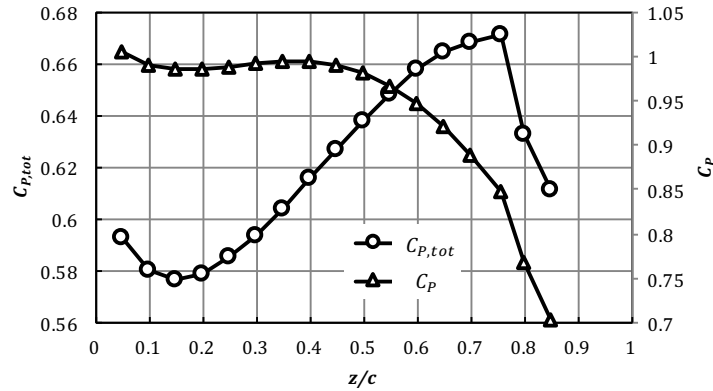

**Figure 12.** Variation of  $C_{P,total}$  with  $z/c$  ( $C_{T,rotor} = 0.927$ ,  $\alpha = 26.2^\circ$ ,  $\Delta r/D = 0.019$ )

duct with smaller  $\alpha$  and  $\Delta r/D$  and a rotor placed at the rear of the duct rather than towards the front. This type of design has been experimentally investigated in Kanya and Visser (2017).

The design for optimal  $C_{P,total}$  attained  $C_{P,total} = 0.67$  which was above Betz's limit. This optimal design was on the brink of flow separation; increases in  $\alpha$ , decreases in  $C_T$  or increases in  $\Delta r/D$  all resulted in flow separation and a sharp decrease in power output. The Hooke and Jeeves optimization method was found to be more efficient in finding the optimal designs compared to Powell's method which was attributed to this sharp variation in  $C_P$  around the design point.

Although optimal design data obtained from Powell's method should represent characteristics of a good design based on  $C_P$  or  $C_{P,total}$ , due to convergence issues they should be considered approximate. Also at higher Reynolds numbers (i.e. with larger DWTs) the flow field and separation characteristics of the DWT may change which in turn can change the characteristics of the optimal design. Additionally, including effect like swirl and center body in the CFD model should give more realistic results and can change the optimal design.

*Competing interests.* The authors declare that they have no conflict of interest.

*Acknowledgements.* We are grateful for the funding support of this project from the New York State Energy and Research Development Authority (NYSERDA) through NEXUS-NY. We would also like to thank Prof. Ken Willmert of Clarkson University for providing the numerical implementation of Powell's method.

## References

- Abe, K.-i. and Ohya, Y.: An Investigation of Flow Fields around Flanged Diffusers Using CFD, *Journal of Wind Engineering and Industrial Aerodynamics*, 92, 315–330, <https://doi.org/https://doi.org/10.1016/j.jweia.2003.12.003>, <http://www.sciencedirect.com/science/article/pii/S0167610503002113>, 2004.
- Aranake, A. and Duraisamy, K.: Aerodynamic Optimization of Shrouded Wind Turbines, *Wind Energy*, 20, 877–889, <https://doi.org/10.1002/we.2068>, <http://dx.doi.org/10.1002/we.2068>, we.2068, 2017.
- De vries, O.: Fluid Dynamic Aspects of Wind Energy Conversion, *AGARDograph*, 243, 1979.
- Foreman, K. M., Gilbert, B., and Oman, R. A.: Diffuser Augmentation of Wind Turbines, *Solar Energy*, 20, 305–311, [https://doi.org/https://doi.org/10.1016/0038-092X\(78\)90122-6](https://doi.org/https://doi.org/10.1016/0038-092X(78)90122-6), <http://www.sciencedirect.com/science/article/pii/0038092X78901226>,  
5 1978.
- Georgalas, C. G., Koras, A. D., and Raptis, S. N.: Parametrization of the Power Enhancement Calculated for Ducted Rotors with Large Tip Clearance, *Wind Engineering*, 15, 128–136, <http://www.jstor.org/stable/43749450>, 1991.
- Gilbert, B. L. and Foreman, K. M.: Experimental Demonstration of the Diffuser-Augmented Wind Turbine Concept, *Journal of Energy*, 3, 235–240, <https://doi.org/10.2514/3.48002>, <https://doi.org/10.2514/3.48002>, 1979.
- 10 Gilbert, B. L. and Foreman, K. M.: Experiments With a Diffuser-Augmented Model Wind Turbine, *Journal of Energy Resources Technology*, 105, 46–53, <http://dx.doi.org/10.1115/1.3230875>, 1983.
- Gilbert, B. L., Oman, R. A., and Foreman, K. M.: Fluid Dynamics of Diffuser-Augmented Wind Turbines, *Journal of Energy*, 2, 368–374, <https://doi.org/10.2514/3.47988>, <https://doi.org/10.2514/3.47988>, 1978.
- Hansen, M. O. L., Sørensen, N. N., and Flay, R. G. J.: Effect of Placing a Diffuser around a Wind Turbine, *Wind Energy*, 3, 207–213,  
15 <https://doi.org/10.1002/we.37>, <http://dx.doi.org/10.1002/we.37>, 2000.
- Hjort, S. and Larsen, H.: A Multi-Element Diffuser Augmented Wind Turbine, *Energies*, 7, 3256–3281, <https://doi.org/10.3390/en7053256>, <http://www.mdpi.com/1996-1073/7/5/3256>, 2014.
- Hooke, R. and Jeeves, T. A.: “ Direct Search” Solution of Numerical and Statistical Problems, *J. ACM*, 8, 212–229, <https://doi.org/10.1145/321062.321069>, <http://doi.acm.org/10.1145/321062.321069>, 1961.
- 20 Igra, O.: Shrouds for Aerogenerators, *AIAA Journal*, 14, 1481–1483, <https://doi.org/10.2514/3.61486>, <https://arc.aiaa.org/doi/abs/10.2514/3.61486>, 1976.
- Igra, O.: Compact Shrouds for Wind Turbines, *Energy Conversion*, 16, 149–157, [https://doi.org/https://doi.org/10.1016/0013-7480\(77\)90022-5](https://doi.org/https://doi.org/10.1016/0013-7480(77)90022-5), <http://www.sciencedirect.com/science/article/pii/0013748077900225>, 1977.
- Igra, O.: Research and Development for Shrouded Wind Turbines, *Energy Conversion and Management*, 21, 13–48,  
25 [https://doi.org/https://doi.org/10.1016/0196-8904\(81\)90005-4](https://doi.org/https://doi.org/10.1016/0196-8904(81)90005-4), <http://www.sciencedirect.com/science/article/pii/0196890481900054>, 1981.
- Jamieson, P. M.: Beating Betz: Energy Extraction Limits in a Constrained Flow Field, *Journal of Solar Energy Engineering*, 131, 031 008–031 008–6, <http://dx.doi.org/10.1115/1.3139143>, 2009.
- Kanya, B. and Visser, K. D.: Experimental Validation of a Ducted Wind Turbine Design Strategy, manuscript submitted for publication,  
30 2017.
- Kardous, M., Chaker, R., Aloui, F., and Nasrallah, S. B.: On the Dependence of an Empty Flanged Diffuser Performance on Flange Height: Numerical Simulations and PIV Visualizations, *Renewable Energy*, 56, 123 – 128,

- <https://doi.org/https://doi.org/10.1016/j.renene.2012.09.061>, <http://www.sciencedirect.com/science/article/pii/S0960148112006611>, the International Conference on Renewable Energy: Generation and Applications, 2013.
- 35 Koras, A. D. and Georgalas, C. G.: Calculation of the Influence of Annular Augmentors on the Performance of a Wind Rotor, *Wind Engineering*, 12, 257–267, <http://www.jstor.org/stable/43750035>, 1988.
- Lilley, G. and Rainbird, W.: A Preliminary Report on the Design and Performance of Ducted Windmills, Tech. rep., College of Aeronautics Cranfield, 1956.
- Menter, F. R.: Two-Equation Eddy-Viscosity Turbulence Models for Engineering Applications, *AIAA Journal*, 32, 1598–1605, <https://doi.org/10.2514/3.12149>, <https://doi.org/10.2514/3.12149>, 1994.
- Ohya, Y., Uchida, T., Karasudani, T., Hasegawa, M., and Kume, H.: Numerical Studies of Flow around a Wind Turbine Equipped with a Flanged-Diffuser Shroud Using an Actuator-Disk Model, *Wind Engineering*, 36, 455–472, <https://doi.org/10.1260/0309-524X.36.4.455>, <https://doi.org/10.1260/0309-524X.36.4.455>, 2012.
- 5 Phillips, D., Flay, R., Nash, T., et al.: Aerodynamic Analysis and Monitoring of the Vortec 7 Diffuser-Augmented Wind Turbine, *Transactions of the Institution of Professional Engineers New Zealand: Electrical/Mechanical/Chemical Engineering Section*, 26, 13, 1999.
- Phillips, D., Richards, P., and Flay, R.: CFD modelling and the development of the diffuser augmented wind turbine, *Wind and Structures*, 5, 10 267–276, 2002.
- Phillips, D. G.: An Investigation on Diffuser Augmented Wind Turbine Design, Ph.D. thesis, ResearchSpace@ Auckland, 2003.
- Politis, G. K. and Koras, A. D.: A Performance Prediction Method for Ducted Medium Loaded Horizontal Axis Windturbines, *Wind Engineering*, 19, 273–288, <http://www.jstor.org/stable/43749587>, 1995.
- Powell, M. J. D.: An Efficient Method for Finding the Minimum of a Function of Several Variables without Calculating Derivatives, *The Computer Journal*, 7, 155–162, <https://doi.org/10.1093/comjnl/7.2.155>, +<http://dx.doi.org/10.1093/comjnl/7.2.155>, 1964.
- 15 Schittkowski, K.: NLPQL: A fortran subroutine solving constrained nonlinear programming problems, *Annals of Operations Research*, 5, 485–500, <https://doi.org/10.1007/BF02022087>, <https://doi.org/10.1007/BF02022087>, 1986.
- Selig, M. S., Guglielmo, J. J., Broeren, A. P., and Giguere, P.: Summary of Low-Speed Airfoil Data - Vol. 2, SoarTech Publications, Virginia Beach, Va, 1996.
- 20 van Bussel, D. G. J. W.: The Science of Making More Torque from Wind: Diffuser Experiments and Theory Revisited., *Journal of Physics: Conference Series*, 75, 012010, <http://stacks.iop.org/1742-6596/75/i=1/a=012010>, 2007.
- van Bussel, G.: An Assessment of the Performance of Diffuser Augmented Wind Turbines (DAWT's), in: *Proceedings of the Third ASME/JSME Joint Fluids Engineering Conference*, CA, 1999.
- Venters, R., Helenbrook, B., and Visser, K. D.: Ducted Wind Turbine Optimization, *Journal of Solar Energy Engineering*, pp. –, <http://dx.doi.org/10.1115/1.4037741>, 2017.
- 25 Werle, M. J. and Presz, W. M.: Ducted Wind/Water Turbines and Propellers Revisited, *Journal of Propulsion and Power*, 24, 1146–1150, <https://doi.org/10.2514/1.37134>, <https://doi.org/10.2514/1.37134>, 2008.
